# Supplementary material for: IL-10 Production Is Critical for Sustaining the Expansion of CD5+ B and NKT Cells and Restraining Autoantibody Production in Congenic Lupus-Prone Mice
Source: PubMed Central journal article supplement (PMC4786215; doi:10.1371/journal.pone.0150515), 2016-03-10
Supplement: pone.0150515.s001.pdf [file pone.0150515.s001.pdf]

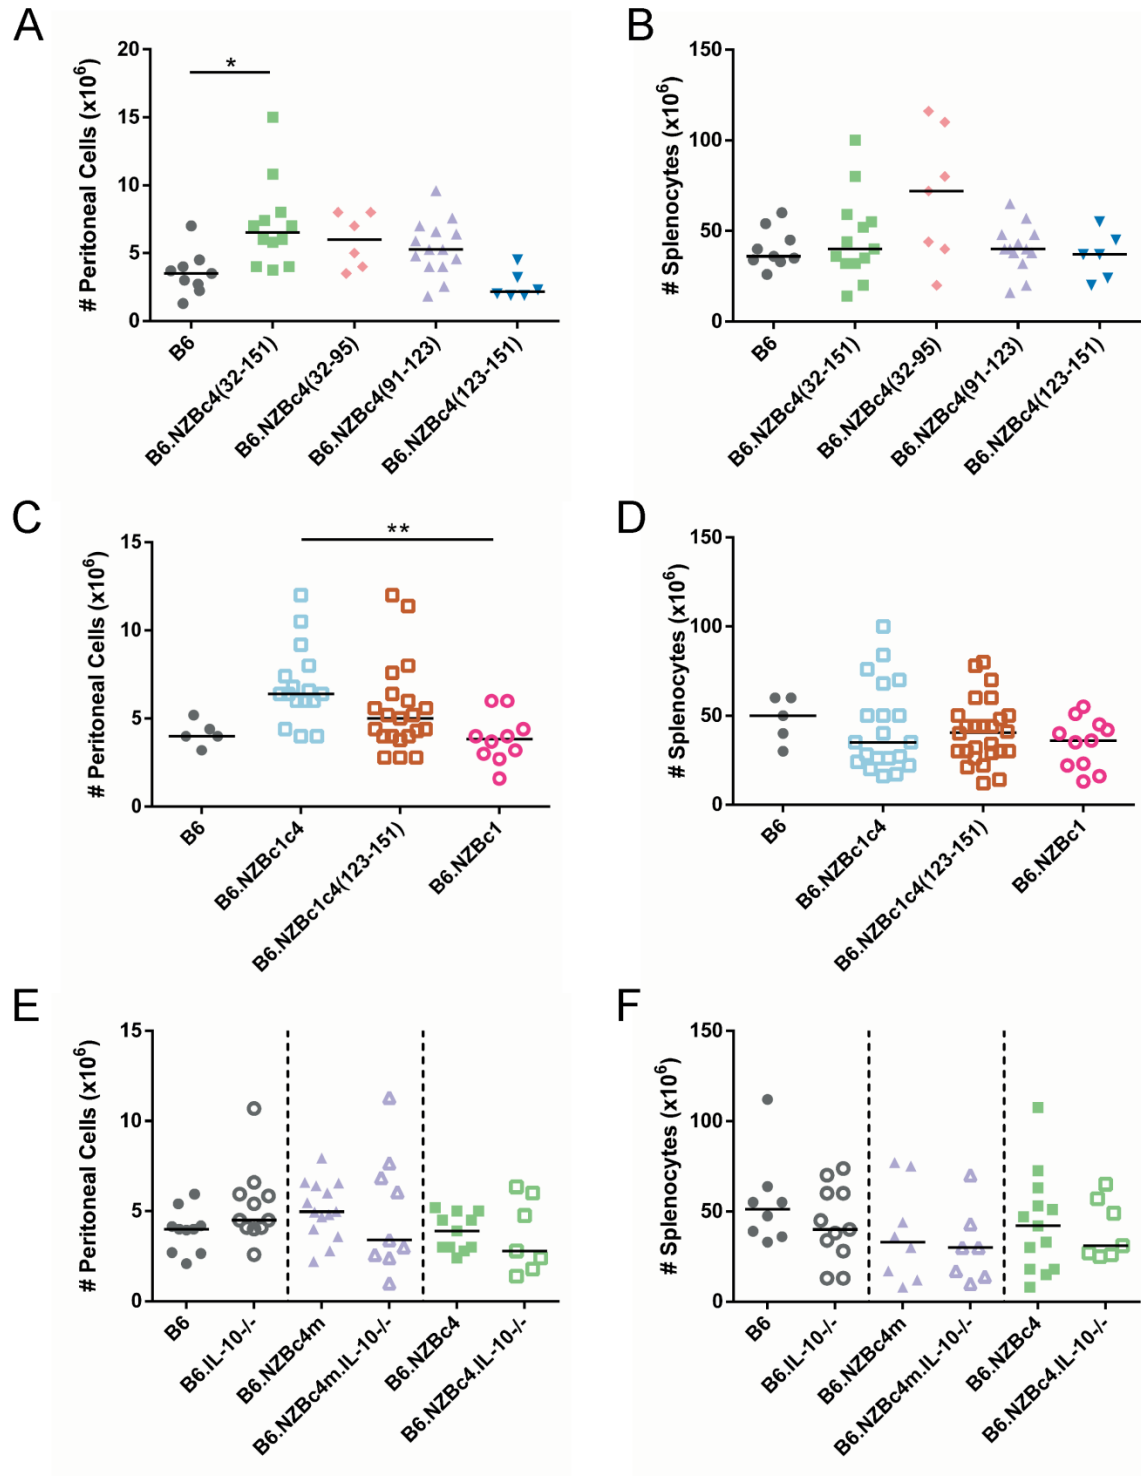

**S1 Fig. Total spleen and peritoneal cavity counts.** Total cell numbers for peritoneal and splenic cells were counted using a hemocytometer. Total cell counts for mice used in Figure 1(A,B), Figure 2(C,D) and Figures 3-6(E,F). Each point represents a single mouse, with the lines for each group representing the median. Statistical analyses were carried out using a Mann-Whitney U tests.
