# Supplementary material for: IL-10 Production Is Critical for Sustaining the Expansion of CD5+ B and NKT Cells and Restraining Autoantibody Production in Congenic Lupus-Prone Mice
Source: PubMed Central journal article supplement (PMC4786215; doi:10.1371/journal.pone.0150515), 2016-03-10
Supplement: pone.0150515.s003.pdf [file pone.0150515.s003.pdf]

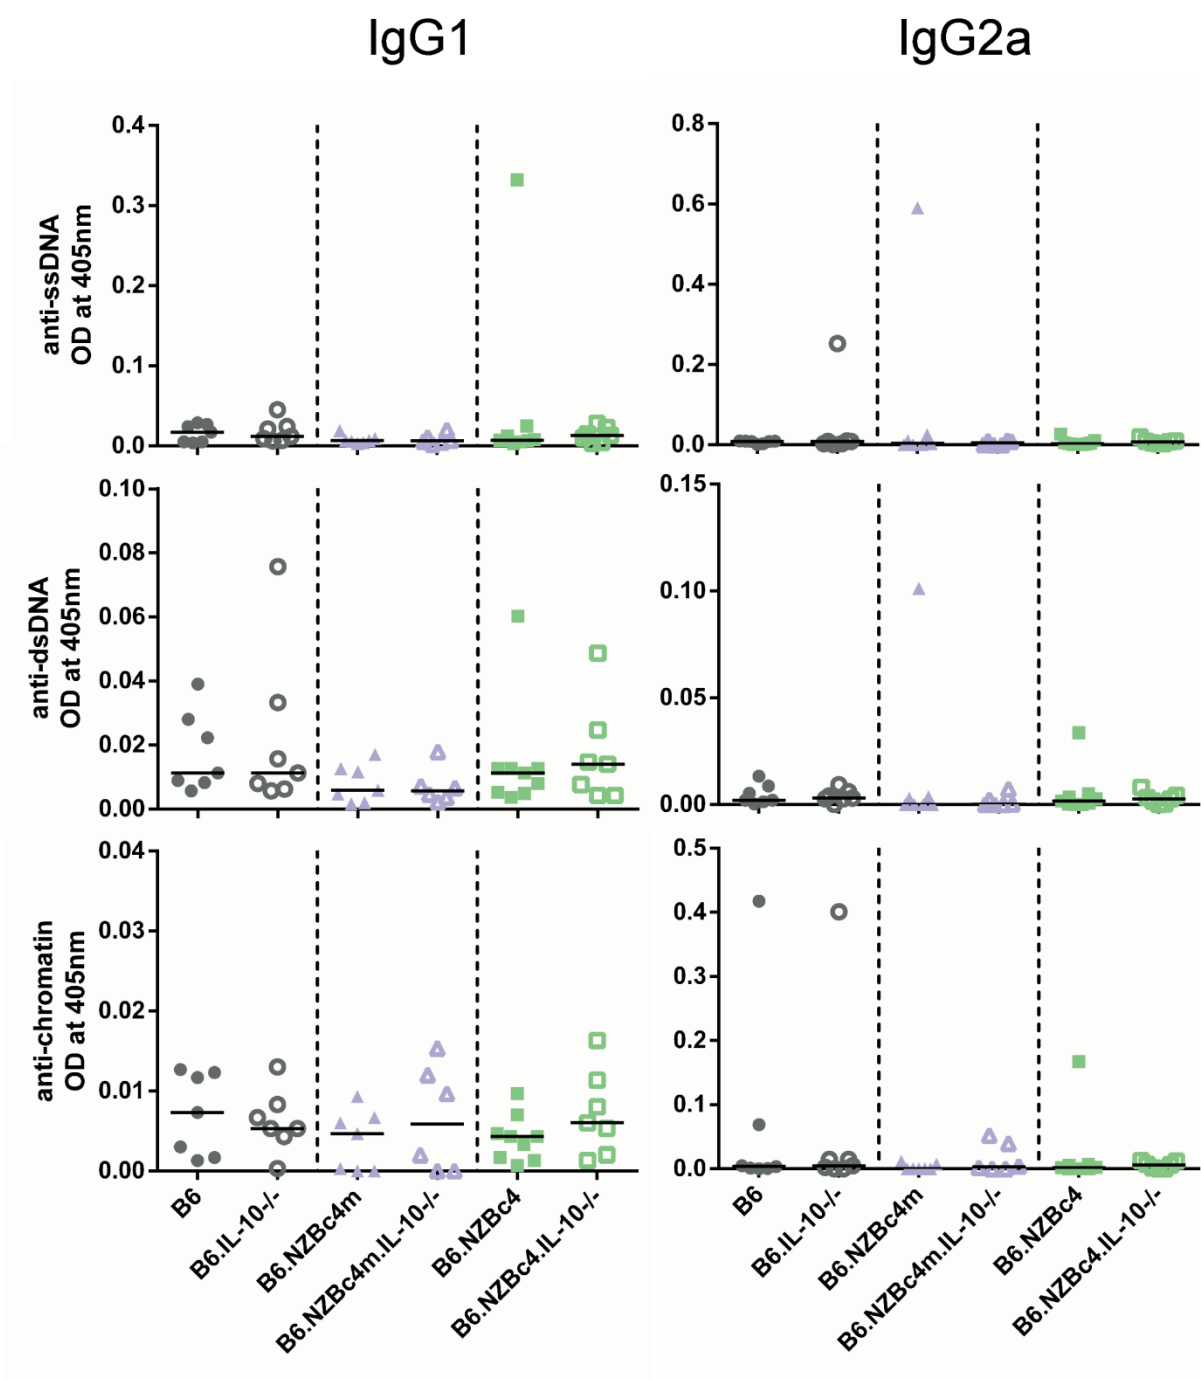

**S3 Fig. Levels of IgG1 and IgG2a autoantibodies in IL-10 knockout mice are unchanged.** Levels of anti-ssDNA, -dsDNA, and -chromatin were measured as previously described. Each point represents a single mouse, with the lines for each group representing the median.
