# Supplementary material for: IL-10 Production Is Critical for Sustaining the Expansion of CD5+ B and NKT Cells and Restraining Autoantibody Production in Congenic Lupus-Prone Mice
Source: PubMed Central journal article supplement (PMC4786215; doi:10.1371/journal.pone.0150515), 2016-03-10
Supplement: pone.0150515.s004.pdf [file pone.0150515.s004.pdf]

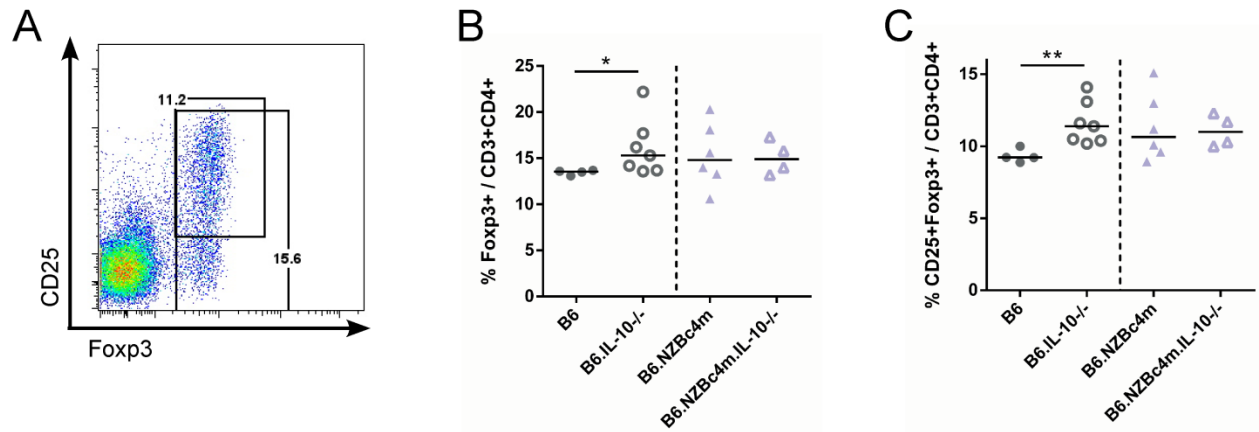

**S4 Fig. The frequency of splenic regulatory T cells is unchanged in B6.NZBc4m IL-10 knockout mice.** (A) Representative flow cytometry plot of CD25<sup>+</sup>Foxp3<sup>+</sup> and Foxp3<sup>+</sup> T regulatory cells from 4 month old B6 mice. (B) The frequency of splenic Foxp3<sup>+</sup> T cells is unchanged in IL-10 knockout mice. (C) The frequency of CD25<sup>+</sup> T regulatory cells was significantly increased in B6 IL-10 knockout mice but unchanged in congenic B6.NZBc4m mice regardless of IL-10 status. Each point represents a single mouse, with the lines for each group representing the median. Statistical analyses were carried out using a Mann-Whitney U test between homozygous and IL-10 knockout animals of the same genetic background. \* P < 0.05, \*\* P < 0.01.
